# Supplementary material for: uvCLAP is a fast and non-radioactive method to identify in vivo targets of RNA-binding proteins
Source: PubMed Central journal article supplement (PMC5861125; doi:10.1038/s41467-018-03575-4), 2018-03-20
Supplement: 41467_2018_3575_MOESM1_ESM.pdf [file 41467_2018_3575_MOESM1_ESM.pdf]

uvCLAP is a fast and non-radioactive method to identify in vivo targets of RNA-binding proteins

*Maticzka et al.*

Supplementary Figure 1

**a**

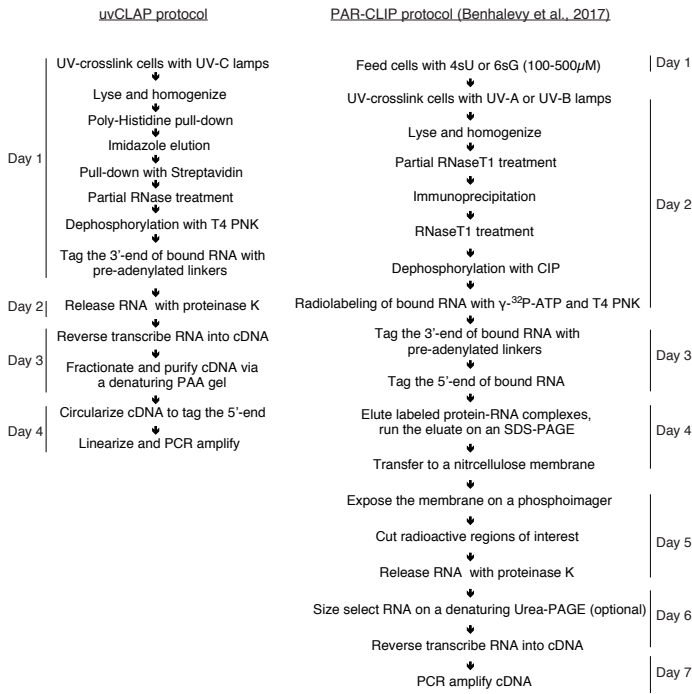

**b**

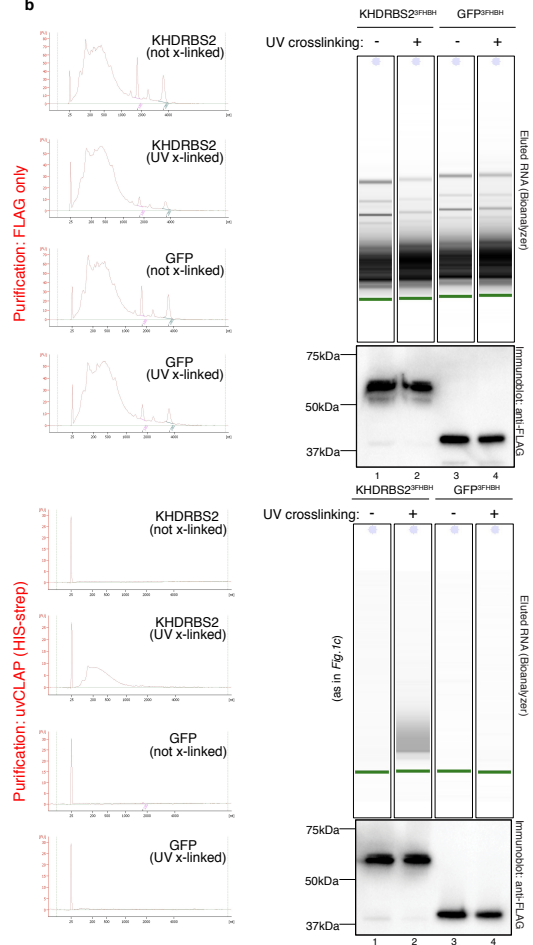

**Supplementary Figure 1:** (a) A step-by-step comparison of the uvCLAP and PAR-CLIP protocols. (b) Bioanalyzer traces of RNA purified from non-crosslinked KHDRBS2<sup>3FHBH</sup> (lane 1), UV-crosslinked KHDRBS2<sup>3FHBH</sup> (lane 2), non-crosslinked GFP<sup>3FHBH</sup> (lane 3) and UV-crosslinked GFP<sup>3FHBH</sup> (lane 4) lysates either via FLAG-beads (top panels) or via the stringent uvCLAP tandem purification scheme as in Fig. 1a (bottom panels). Eluted protein from the same samples, analysed in parallel via immunoblotting with anti-FLAG antibodies are shown below the Bioanalyzer traces.

Supplementary Figure 2

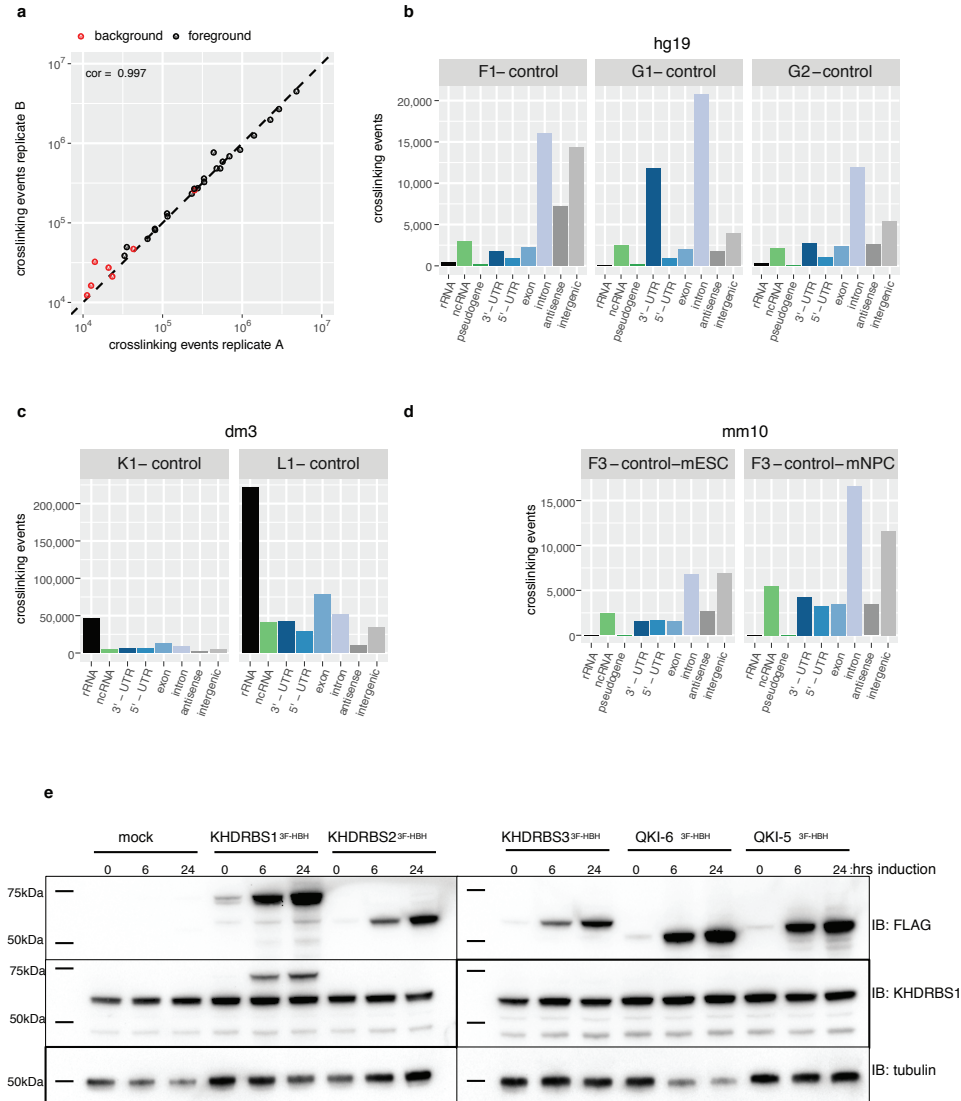

**Supplementary Figure 2:** (a) Expression of stably integrated, 3xFLAG-HBH-tagged KHDRBS1, KHDRBS2, KHDRBS3, QKI-5 and QKI-6 constructs in HEK293 Fln-In T-REX cells. Transgenes were induced with 0.1 $\mu$ g/mL doxycycline for either 6 or 24 hours before lysis and immunoblotting. Immunoblotting with a polyclonal antibody against KHDRBS1 shows that KHDRBS13F-HBH construct is under expressed compared to endogenously expressed KHDRBS1 at all time points. (b) Comparison of total number of crosslinking events as in Fig. 2b, combined into single plot (Pearson correlation 0.997,  $n=30$ ,  $p$ -value  $< 2.2e-16$ ). (c) Number of crosslinking events located on genomic target classes for three uvCLAP background controls in human. Each crosslinking event was assigned to the leftmost matching category. (d) Number of crosslinking events located on genomic target classes for two uvCLAP background controls in Drosophila. Each crosslinking event was assigned to the leftmost matching category. (e) Number of crosslinking events located on genomic target classes for two uvCLAP background controls in mouse. Each crosslinking event was assigned to the leftmost matching category.

Supplementary Figure 3

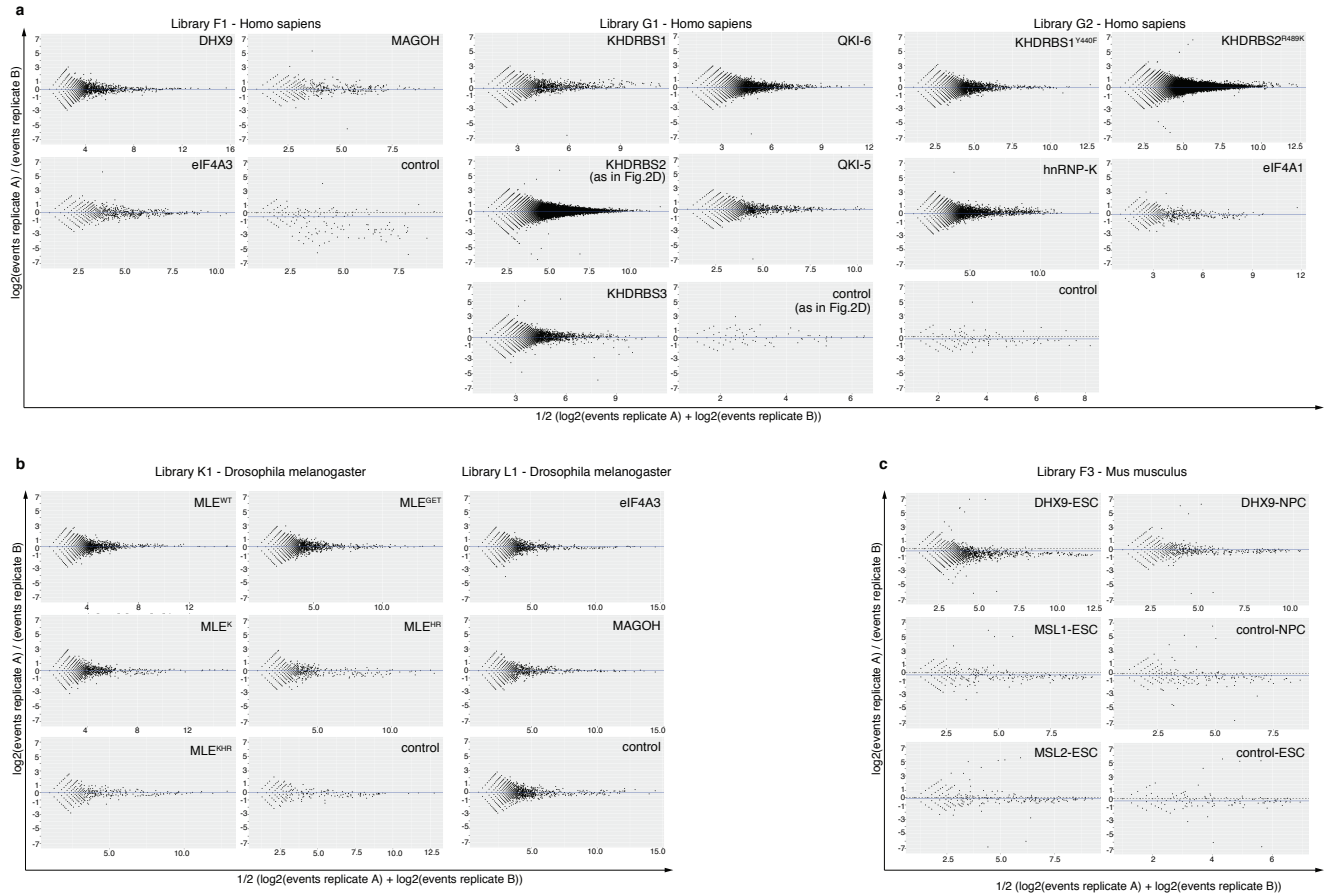

**Supplementary Figure 3:** MA-plots comparing crosslinking event counts for pairwise biological replicates of genomic 100 nucleotide bins covered by at least 2 crosslinking events in both replicates for (a) 15 uvCLAP experiments in human, (b) 9 uvCLAP experiments in *Drosophila*, and (c) 6 uvCLAP experiments in mouse. The median log<sub>2</sub> fold change is indicated in blue. Related to Fig. 2c.

Supplementary Figure 4

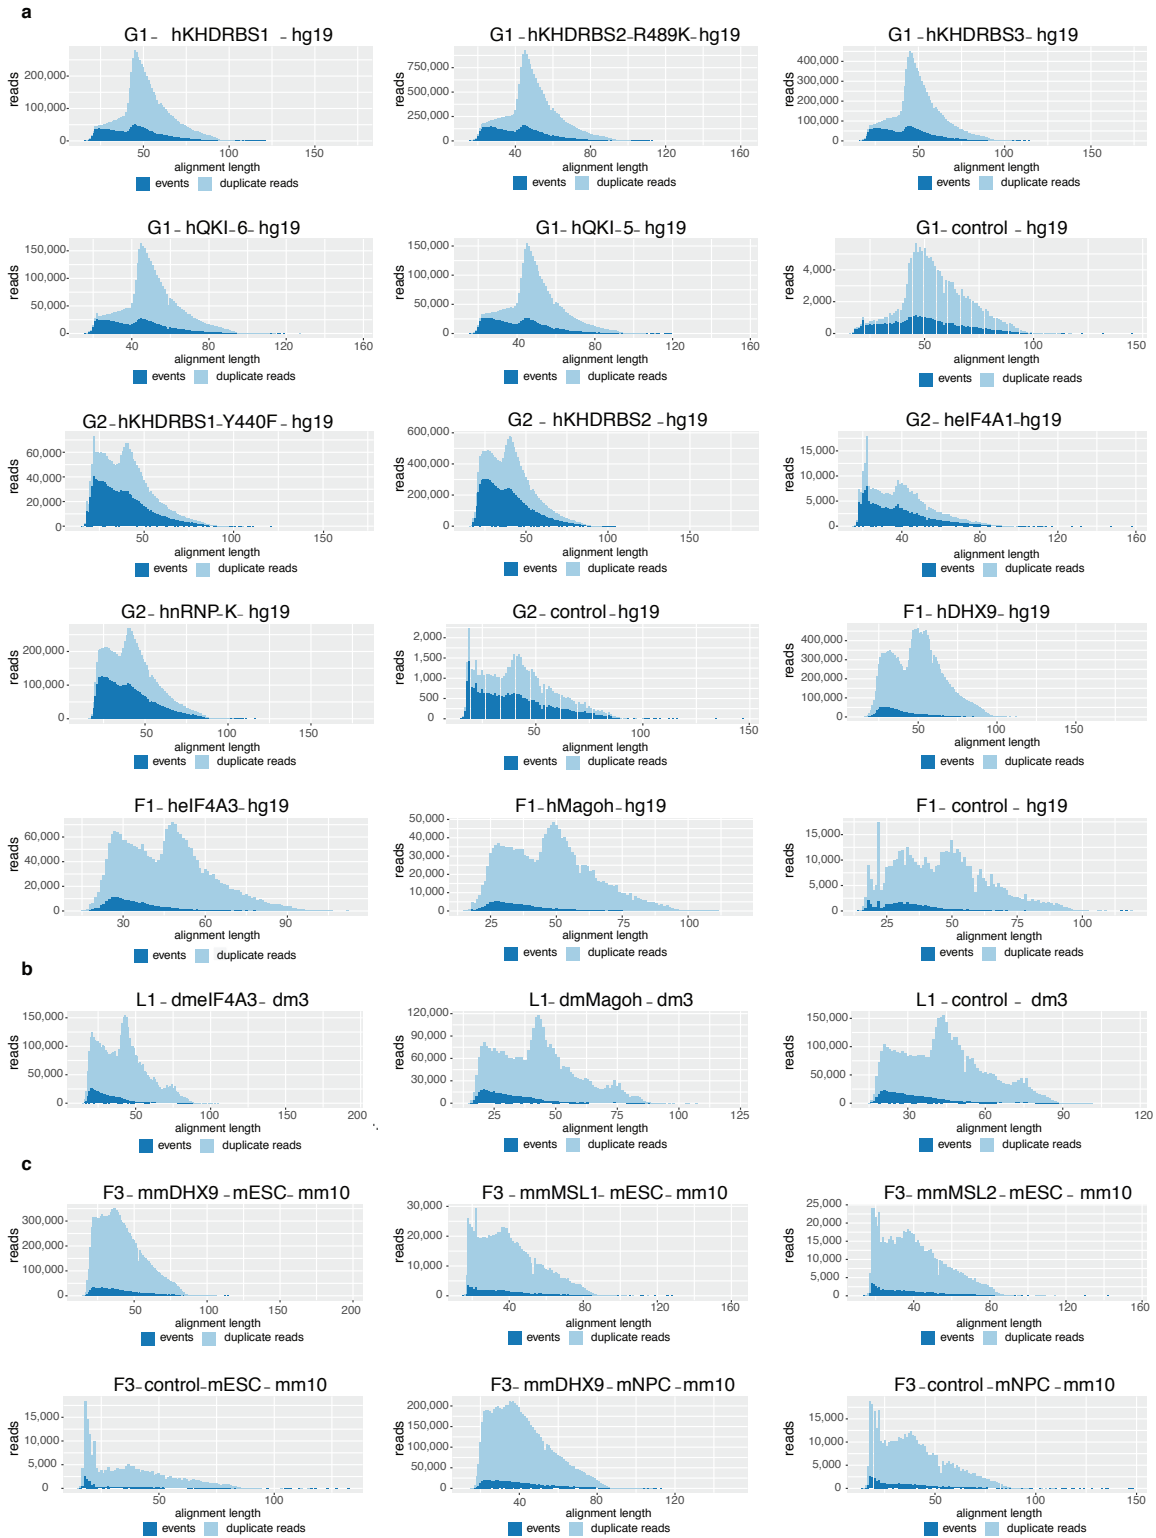

**Supplementary Figure 4:** Number of reads categorized as crosslinking events and PCR duplicates dependent on alignment length as proxy for cDNA insert size for (a) 15 uvCLAP experiments in human, (b) 3 uvCLAP experiments in *Drosophila*, and (c) 6 uvCLAP experiments in mouse. Related to Fig. 2e.

Supplementary Figure 5

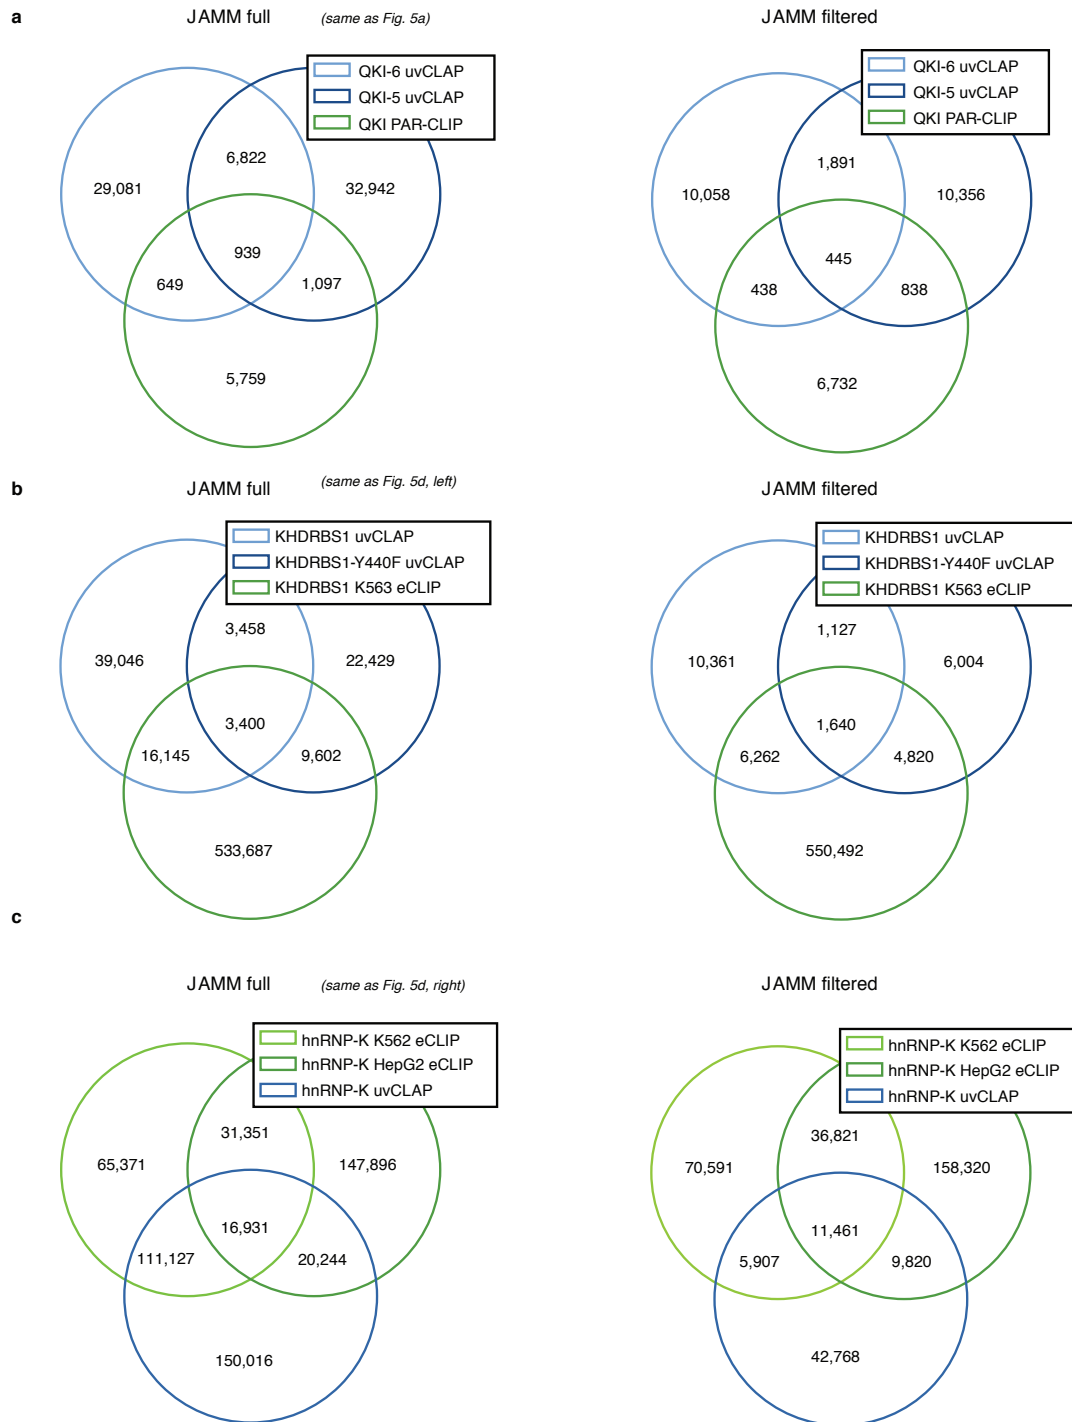

**Supplementary Figure 5:** Overlaps for full and filtered JAMM peaks between (a) QKI-5 uvCLAP, QKI-6 uvCLAP and QKI PAR-CLIP peaks; (b) KHDRBS1 uvCLAP, KHDRBS1Y440F uvCLAP and KHDRBS1 K564 eCLIP peaks; and (c) hnRNP-K uvCLAP, hnRNP-K K562 eCLIP and hnRNP-K HepG2 eCLIP peaks. Related to Fig. 5a-d.

Supplementary Figure 6

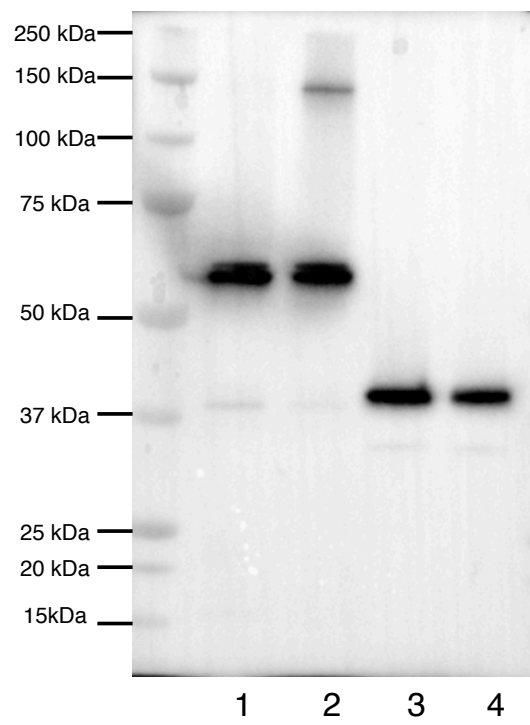

**Supplementary Figure 6:** Uncropped image of the blot presented in Fig. 1c.

| experiment             | read pairs | mapped read pairs | percent mapped | uniquely mapped read pairs | fraction uniquely mapped | crosslinking events | avg reads per event |
|------------------------|------------|-------------------|----------------|----------------------------|--------------------------|---------------------|---------------------|
| F1 control repA        | 1,307,646  | 477,654           | 36.53%         | 172,534                    | 36.12%                   | 14,083              | 12.25               |
| F1 control repB        | 4,568,976  | 1,166,107         | 25.52%         | 369,663                    | 31.70%                   | 32,371              | 11.42               |
| F1 hDXH9 repA          | 41,315,813 | 31,567,521        | 76.41%         | 9,158,346                  | 29.01%                   | 692,429             | 13.23               |
| F1 hDXH9 repB          | 41,325,930 | 31,428,779        | 76.05%         | 9,187,391                  | 29.23%                   | 686,441             | 13.38               |
| F1 helF4A3 repA        | 4,921,062  | 3,251,957         | 66.08%         | 1,242,806                  | 38.22%                   | 115,368             | 10.77               |
| F1 helF4A3 repB        | 5,034,306  | 3,467,946         | 68.89%         | 1,318,211                  | 38.01%                   | 120,461             | 10.94               |
| F1 hMagoh repA         | 3,673,447  | 2,193,846         | 59.72%         | 908,694                    | 41.42%                   | 64,697              | 14.05               |
| F1 hMagoh repB         | 3,555,747  | 2,152,408         | 60.53%         | 851,919                    | 39.58%                   | 62,851              | 13.55               |
| F3 control-mESC repA   | 1,341,909  | 290,047           | 21.61%         | 112,698                    | 38.86%                   | 11,239              | 10.03               |
| F3 control-mESC repB   | 1,505,169  | 342,932           | 22.78%         | 120,261                    | 35.07%                   | 12,284              | 9.79                |
| F3 control-mNPC repA   | 2,036,638  | 590,303           | 28.98%         | 213,732                    | 36.21%                   | 20,939              | 10.21               |
| F3 control-mNPC repB   | 2,445,617  | 807,502           | 33.02%         | 284,625                    | 35.25%                   | 27,328              | 10.42               |
| F3 mmDXH9-mESC repA    | 13,797,220 | 10,731,484        | 77.78%         | 4,794,563                  | 44.68%                   | 438,295             | 10.94               |
| F3 mmDXH9-mESC repB    | 22,331,283 | 18,091,154        | 81.01%         | 8,407,634                  | 46.47%                   | 765,502             | 10.98               |
| F3 mmDXH9-mNPC repA    | 9,295,682  | 7,416,537         | 79.78%         | 3,762,721                  | 50.73%                   | 331,254             | 11.36               |
| F3 mmDXH9-mNPC repB    | 10,043,288 | 7,941,592         | 79.07%         | 4,090,946                  | 51.51%                   | 360,292             | 11.35               |
| F3 mmMSL1-A1-mESC repA | 2,436,943  | 1,012,377         | 41.54%         | 389,426                    | 38.47%                   | 35,508              | 10.97               |
| F3 mmMSL1-A1-mESC repB | 3,527,053  | 1,409,099         | 39.95%         | 541,164                    | 38.40%                   | 49,584              | 10.91               |
| F3 mmMSL2-G5-mESC repA | 2,763,342  | 946,524           | 34.25%         | 345,839                    | 36.54%                   | 33,214              | 10.41               |
| F3 mmMSL2-G5-mESC repB | 2,920,665  | 1,114,303         | 38.15%         | 408,648                    | 36.67%                   | 38,547              | 10.60               |
| G1 control repA        | 264,679    | 150,356           | 56.81%         | 87,835                     | 58.42%                   | 23,320              | 3.77                |
| G1 control repB        | 261,108    | 135,030           | 51.71%         | 79,590                     | 58.94%                   | 21,155              | 3.76                |
| G1 hKHDRBS1 repA       | 8,421,328  | 5,861,206         | 69.60%         | 3,602,087                  | 61.46%                   | 942,495             | 3.82                |
| G1 hKHDRBS1 repB       | 6,224,221  | 4,986,412         | 80.11%         | 3,129,895                  | 62.77%                   | 827,381             | 3.78                |
| G1 hKHDRBS2-R489K repA | 19,941,764 | 16,372,513        | 82.10%         | 10,938,476                 | 66.81%                   | 2,903,269           | 3.77                |
| G1 hKHDRBS2-R489K repB | 23,049,088 | 15,059,914        | 65.34%         | 10,108,441                 | 67.12%                   | 2,690,138           | 3.76                |
| G1 hKHDRBS3 repA       | 9,742,233  | 7,942,689         | 81.53%         | 5,505,964                  | 69.32%                   | 1,408,224           | 3.91                |
| G1 hKHDRBS3 repB       | 8,912,187  | 7,083,910         | 79.49%         | 4,872,189                  | 68.78%                   | 1,251,194           | 3.89                |
| G2 control repA        | 171,772    | 54,353            | 31.64%         | 26,147                     | 48.11%                   | 12,630              | 2.07                |
| G2 control repB        | 200,107    | 74,607            | 37.28%         | 35,349                     | 47.38%                   | 16,263              | 2.17                |
| G2 hKHDRBS2 repA       | 20,259,011 | 16,519,787        | 81.54%         | 9,371,716                  | 56.73%                   | 4,808,843           | 1.95                |
| G2 hKHDRBS2 repB       | 18,766,041 | 15,475,107        | 82.46%         | 8,772,819                  | 56.69%                   | 4,490,947           | 1.95                |
| G2 helF4A1 repA        | 922,454    | 589,489           | 63.90%         | 162,724                    | 27.60%                   | 79,913              | 2.04                |
| G2 helF4A1 repB        | 1,025,765  | 643,082           | 62.69%         | 174,682                    | 27.16%                   | 84,031              | 2.08                |
| G2 hnRNP-K repA        | 10,530,351 | 8,943,992         | 84.94%         | 4,778,058                  | 53.42%                   | 2,256,679           | 2.12                |
| G2 hnRNP-K repB        | 9,360,508  | 7,994,570         | 85.41%         | 4,153,006                  | 51.95%                   | 1,972,476           | 2.11                |
| K1 control repA        | 201,994    | 105,162           | 52.06%         | 71,522                     | 68.01%                   | 42,975              | 1.66                |
| K1 control repB        | 248,710    | 115,501           | 46.44%         | 78,032                     | 67.56%                   | 46,905              | 1.66                |
| K1 dmMLE-wt repA       | 1,069,726  | 822,726           | 76.91%         | 527,632                    | 64.13%                   | 332,817             | 1.59                |
| K1 dmMLE-wt repB       | 1,042,834  | 799,808           | 76.70%         | 515,526                    | 64.46%                   | 325,564             | 1.58                |
| L1 control repA        | 5,352,474  | 3,652,042         | 68.23%         | 2,376,439                  | 65.07%                   | 251,258             | 9.46                |
| L1 control repB        | 6,376,992  | 3,967,611         | 62.22%         | 2,605,568                  | 65.67%                   | 256,890             | 10.14               |
| L1 dmefF4A3 repA       | 4,996,191  | 3,381,858         | 67.69%         | 2,318,915                  | 68.57%                   | 249,923             | 9.28                |
| L1 dmefF4A3 repB       | 5,544,132  | 3,699,513         | 66.73%         | 2,539,095                  | 68.63%                   | 267,781             | 9.48                |
| L1 dmMagoh repA        | 4,082,965  | 2,690,605         | 65.90%         | 1,724,312                  | 64.09%                   | 194,246             | 8.88                |
| L1 dmMagoh repB        | 4,056,552  | 2,715,860         | 66.95%         | 1,770,807                  | 65.20%                   | 197,389             | 8.97                |

Supplementary Table 1: uvCLAP mapping statistics.



| library | pulldown       | genome  | median foldchange |
|---------|----------------|---------|-------------------|
| G1      | hKHDRBS1       | hg19    | 1.00              |
| G1      | hKHDRBS2-R489K | hg19    | 1.00              |
| G1      | hKHDRBS3       | hg19    | 1.00              |
| G1      | hQKI-A         | hg19    | 1.00              |
| G1      | hQKI-B         | hg19    | 1.00              |
| G1      | control        | hg19    | 1.00              |
| K1      | dmMLE-GET      | dm3     | 1.00              |
| K1      | dmMLE-HR       | dm3     | 1.00              |
| K1      | dmMLE-K        | dm3     | 1.00              |
| K1      | dmMLE-KHR      | dm3     | 1.00              |
| K1      | dmMLE-wt       | dm3     | 1.00              |
| K1      | control        | dm3     | 1.00              |
| G2      | heIF4A1        | hg19    | 1.00              |
| G2      | hKHDRBS1-K440F | hg19    | 1.00              |
| G2      | hKHDRBS2       | hg19    | 1.00              |
| G2      | hnRNP-K        | hg19    | 1.00              |
| G2      | control        | hg19    | 0.80              |
| L1      | dmeIF4A3       | dm3     | 1.00              |
| L1      | dmMagoh        | dm3     | 1.00              |
| L1      | control        | dm3     | 1.00              |
| F3      | mmDHX9-mNPC    | mm10    | 1.00              |
| F3      | control-mNPC   | mm10    | 0.83              |
| F3      | mmDHX9-mESC    | mm10    | 0.80              |
| F3      | mmMSL1-mESC    | mm10    | 0.80              |
| F3      | mmMSL2-mESC    | mm10    | 0.95              |
| F3      | control-mESC   | mm10    | 0.80              |
| F1      | hDHX9          | hg19    | 1.00              |
| F1      | heIF4A3        | hg19    | 1.00              |
| F1      | hMagoh         | hg19    | 1.00              |
| F1      | control        | hg19    | 0.67              |
|         |                | median  | 1.00              |
|         |                | average | 0.96              |

**Supplementary Table 2:** Median between-replicate fold changes of crosslinking events for genomic bins of 100 nucleotides.

| library | pulldown       | organism | fg events | bg events | fg/bg  | log2(fg/bg) |
|---------|----------------|----------|-----------|-----------|--------|-------------|
| F1      | hDHX9          | hg19     | 1,378,869 | 46,454    | 29.68  | 4.89        |
| F1      | heIF4A3        | hg19     | 235,829   | 46,454    | 5.08   | 2.34        |
| F1      | hMagoh         | hg19     | 127,548   | 46,454    | 2.75   | 1.46        |
| F3      | mmDHX9-mESC    | mm10     | 1,203,797 | 23,523    | 51.18  | 5.68        |
| F3      | mmDHX9-mNPC    | mm10     | 691,546   | 48,267    | 14.33  | 3.84        |
| F3      | mmMSL1-mESC    | mm10     | 85,092    | 23,523    | 3.62   | 1.85        |
| F3      | mmMSL2-mESC    | mm10     | 71,761    | 23,523    | 3.05   | 1.61        |
| G1      | hKHDRBS1       | hg19     | 1,769,876 | 44,475    | 39.79  | 5.31        |
| G1      | hKHDRBS2-R489K | hg19     | 5,593,407 | 44,475    | 125.77 | 6.97        |
| G1      | hKHDRBS3       | hg19     | 2,659,418 | 44,475    | 59.80  | 5.90        |
| G1      | hQKI-A         | hg19     | 1,012,625 | 44,475    | 22.77  | 4.51        |
| G1      | hQKI-B         | hg19     | 960,226   | 44,475    | 21.59  | 4.43        |
| G2      | heIF4A1        | hg19     | 163,944   | 28,893    | 5.67   | 2.50        |
| G2      | hKHDRBS1-K440F | hg19     | 1,154,625 | 28,893    | 39.96  | 5.32        |
| G2      | hKHDRBS2       | hg19     | 9,299,790 | 28,893    | 321.87 | 8.33        |
| G2      | hnRNP-K        | hg19     | 4,229,155 | 28,893    | 146.37 | 7.19        |
| K1      | dmMLE-GET      | dm3      | 465,362   | 89,880    | 5.18   | 2.37        |
| K1      | dmMLE-HR       | dm3      | 244,845   | 89,880    | 2.72   | 1.45        |
| K1      | dmMLE-K        | dm3      | 548,249   | 89,880    | 6.10   | 2.61        |
| K1      | dmMLE-KHR      | dm3      | 161,889   | 89,880    | 1.80   | 0.85        |
| K1      | dmMLE-wt       | dm3      | 658,381   | 89,880    | 7.33   | 2.87        |
| L1      | dmeIF4A3       | dm3      | 517,704   | 508,148   | 1.02   | 0.03        |
| L1      | dmMagoh        | dm3      | 391,635   | 508,148   | 0.77   | -0.38       |

**Supplementary Table 3:** Foreground to background ratios (replicates combined) for 23 uvCLAP experiments. Related to Fig. 2d.

| library | pulldown       | genome | JAMM peaks | no background within 50 nt | percent no background within 50 nt |
|---------|----------------|--------|------------|----------------------------|------------------------------------|
| F1      | hDHX9          | hg19   | 41,756     | 40,122                     | 96.09%                             |
| F1      | heIF4A3        | hg19   | 5,004      | 4,369                      | 87.31%                             |
| F1      | hMagoh         | hg19   | 2,299      | 1,827                      | 79.47%                             |
| F3      | mmDHX9-mESC    | mm10   | 40,695     | 40,230                     | 98.86%                             |
| F3      | mmDHX9-mNPC    | mm10   | 14,905     | 14,428                     | 96.80%                             |
| F3      | mmMSL1-mESC    | mm10   | 479        | 274                        | 57.20%                             |
| F3      | mmMSL2-mESC    | mm10   | 510        | 305                        | 59.80%                             |
| G1      | hKHDRBS1       | hg19   | 67,139     | 62,898                     | 93.68%                             |
| G1      | hKHDRBS2-R489K | hg19   | 140,986    | 129,330                    | 91.73%                             |
| G1      | hKHDRBS3       | hg19   | 134,764    | 127,265                    | 94.44%                             |
| G1      | hQKI-A         | hg19   | 39,917     | 34,579                     | 86.63%                             |
| G1      | hQKI-B         | hg19   | 44,500     | 41,977                     | 94.33%                             |
| G2      | heIF4A1        | hg19   | 3,555      | 3,057                      | 85.99%                             |
| G2      | hKHDRBS1-Y440F | hg19   | 41,309     | 39,801                     | 96.35%                             |
| G2      | hKHDRBS2       | hg19   | 298,135    | 294,198                    | 98.68%                             |
| G2      | hnRNP-K        | hg19   | 220,004    | 216,607                    | 98.46%                             |
| K1      | dmMLE-GET      | dm3    | 14,989     | 12,448                     | 83.05%                             |
| K1      | dmMLE-HR       | dm3    | 5,373      | 4,229                      | 78.71%                             |
| K1      | dmMLE-K        | dm3    | 11,150     | 9,397                      | 84.28%                             |
| K1      | dmMLE-KHR      | dm3    | 2,454      | 1,634                      | 66.59%                             |
| K1      | dmMLE-wt       | dm3    | 19,263     | 16,744                     | 86.92%                             |
| L1      | dmeIF4A3       | dm3    | 12,501     | 3,326                      | 26.61%                             |
| L1      | dmMagoh        | dm3    | 6,723      | 1,102                      | 16.39%                             |

**Supplementary Table 4:** Amount of background co-located with JAMM peaks from 23 uvCLAP experiments.

| library  | protein  | Spearman's rank correlation rho | number of peaks |
|----------|----------|---------------------------------|-----------------|
| G1       | hKHDRBS1 | 0.95140                         | 1,109           |
| G1       | hQKI     | 0.95037                         | 2,111           |
| G1       | hQKI     | 0.95037                         | 785             |
| F1       | heIF4A3  | 0.94611                         | 485             |
| F1       | hDHX9    | 0.93792                         | 991             |
| G2       | hnRNP    | 0.93740                         | 1,983           |
| G1       | hKHDRBS2 | 0.93190                         | 30,304          |
| G2       | hKHDRBS2 | 0.93057                         | 43,563          |
| F1       | hMagoh   | 0.92428                         | 198             |
| G1       | hQKI     | 0.89798                         | 2,111           |
| G1       | hQKI     | 0.89798                         | 785             |
| G1       | hKHDRBS3 | 0.88282                         | 1,519           |
| G2       | hKHDRBS1 | 0.87307                         | 1,678           |
| G2       | heIF4A1  | 0.85165                         | 300             |
| average: |          | 0.91885                         |                 |

**Supplementary Table 5:** Peak counts and pairwise Spearman correlations for PEAChu peaks.

| library | protein        | rRNA | tRNA | snoRNA | snRNA | lincRNA | misc_ncRNA | pseudogene | protcod_as | 3UTR   | 5UTR  | exon   | intron  | antisense | intergenic |
|---------|----------------|------|------|--------|-------|---------|------------|------------|------------|--------|-------|--------|---------|-----------|------------|
| F1      | hDXH9          | 19   | 205  | 162    | 27    | 970     | 671        | 350        | 542        | 2,443  | 923   | 1,455  | 29,811  | 992       | 3,186      |
| F1      | heIF4A3        | 7    | 303  | 173    | 39    | 94      | 106        | 45         | 24         | 854    | 630   | 2,087  | 295     | 87        | 260        |
| F1      | hMagoh         | 8    | 215  | 109    | 30    | 58      | 66         | 13         | 15         | 312    | 218   | 954    | 131     | 47        | 123        |
| G1      | hKHDRBS1       | 15   | 212  | 102    | 33    | 2,035   | 654        | 342        | 953        | 10,968 | 890   | 1,737  | 43,511  | 1,200     | 4,487      |
| G1      | hKHDRBS2-R489K | 9    | 117  | 74     | 19    | 3,398   | 1,260      | 976        | 1,622      | 46,374 | 2,835 | 9,256  | 60,349  | 3,601     | 11,096     |
| G1      | hKHDRBS3       | 12   | 160  | 102    | 45    | 3,183   | 1,154      | 509        | 1,349      | 14,883 | 871   | 1,615  | 101,307 | 1,826     | 7,748      |
| G1      | hQKI-A         | 12   | 136  | 50     | 39    | 807     | 455        | 194        | 378        | 20,471 | 903   | 2,596  | 10,525  | 754       | 2,597      |
| G1      | hQKI-B         | 12   | 162  | 55     | 65    | 1,142   | 479        | 176        | 580        | 3,425  | 345   | 526    | 33,635  | 716       | 3,182      |
| G2      | heIF4A1        | 6    | 154  | 86     | 15    | 97      | 66         | 26         | 24         | 347    | 1,585 | 574    | 147     | 133       | 295        |
| G2      | hKHDRBS1-K440F | 11   | 195  | 107    | 14    | 893     | 378        | 265        | 363        | 25,339 | 1,513 | 4,417  | 4,630   | 785       | 2,399      |
| G2      | hKHDRBS2       | 16   | 266  | 180    | 57    | 6,760   | 2,771      | 1,946      | 3,417      | 52,996 | 5,185 | 17,865 | 177,385 | 6,761     | 22,530     |
| G2      | hnRNP-K        | 26   | 304  | 212    | 71    | 4,931   | 2,884      | 1,097      | 3,269      | 19,086 | 5,948 | 9,058  | 148,914 | 5,504     | 18,700     |

  

| library | protein   | rRNA | snoRNA | snRNA | ncRNA | tRNA | 3UTR  | 5UTR  | exon  | intron | antisense | intergenic |
|---------|-----------|------|--------|-------|-------|------|-------|-------|-------|--------|-----------|------------|
| K1      | dmMLE-GET | 4    | 45     | 6     | 190   | 18   | 2,323 | 885   | 1,969 | 5,879  | 1,067     | 2,603      |
| K1      | dmMLE-HR  | 1    | 51     | 9     | 111   | 36   | 526   | 378   | 543   | 2,514  | 366       | 838        |
| K1      | dmMLE-K   | 4    | 66     | 7     | 173   | 36   | 927   | 710   | 1,084 | 5,511  | 898       | 1,734      |
| K1      | dmMLE-KHR | 2    | 96     | 11    | 87    | 17   | 372   | 355   | 523   | 572    | 109       | 310        |
| K1      | dmMLE-wt  | 3    | 63     | 6     | 206   | 34   | 1,353 | 1,045 | 1,478 | 10,689 | 1,455     | 2,931      |
| L1      | dmeIF4A3  | 22   | 141    | 13    | 106   | 33   | 1,336 | 1,960 | 7,184 | 914    | 190       | 602        |
| L1      | dmMagoh   | 24   | 163    | 15    | 70    | 92   | 1,157 | 1,190 | 2,561 | 704    | 176       | 571        |

  

| library | protein     | rRNA | tRNA | snoRNA | snRNA | lincRNA | misc_ncRNA | pseudogene | 3UTR  | 5UTR  | exon | intron | antisense | intergenic |
|---------|-------------|------|------|--------|-------|---------|------------|------------|-------|-------|------|--------|-----------|------------|
| F3      | mmDXH9-mESC | 2    | 173  | 127    | 22    | 458     | 5          | 48         | 2,053 | 1,113 | 642  | 32,861 | 693       | 2,498      |
| F3      | mmDXH9-mNPC | 2    | 72   | 85     | 11    | 210     | 4          | 14         | 1,373 | 585   | 508  | 11,165 | 159       | 717        |
| F3      | mmMSL1-mESC | 1    | 30   | 64     | 10    | 18      | 6          | 1          | 34    | 57    | 36   | 69     | 45        | 108        |
| F3      | mmMSL2-mESC | 2    | 29   | 51     | 8     | 21      | 5          | 1          | 38    | 65    | 45   | 68     | 39        | 138        |

**Supplementary Table 6:** Number of crosslinking events located on target classes. Related to Fig.s 3 and 4a,b and Supplementary Fig. 2c-e.

| id        | tag   |
|-----------|-------|
| 5'-tag 1  | AGTCA |
| 5'-tag 2  | GAGGT |
| 5'-tag 3  | ATCGT |
| 5'-tag 4  | GTTCT |
| 5'-tag 5  | TACCT |
| 5'-tag 6  | AGAAT |
| 5'-tag 7  | ACTTG |
| 5'-tag 8  | GTATG |
| 5'-tag 9  | CGGCC |
| 5'-tag 10 | TCACG |
| 5'-tag 11 | GCCAG |
| 5'-tag 12 | CTCTC |
| 5'-tag 13 | TGATA |
| 5'-tag 14 | GCTGA |
| 5'-tag 15 | CTACA |

**Supplementary Table 7:** Selected uvCLAP 5'-tags.
